# Supplementary material for: A multifunctional Cd(ii)-based metal–organic framework with amide groups exhibiting luminescence sensing towards multiple substances
Source: Royal Society of Chemistry journal article supplement (doi:10.1039/d0ce01061h), 2020-01-01
Supplement: d0ce01061h1.pdf [file d0ce01061h1.pdf]

## **Electronic Supporting Information**

**A multifunctional Cd(II)-based metal–organic framework with amide groups exhibiting luminescent sensing towards multiple substances**

Runzhong Guo, Hao Dong, Peiyuan Li, Yi Sun, Haiying Wang\* and Huiyan Liu\*

School of Chemistry & Materials Science, Jiangsu Key Laboratory of Green Synthetic Chemistry for Functional Materials, Jiangsu Normal University, Xuzhou 221116, P. R. China

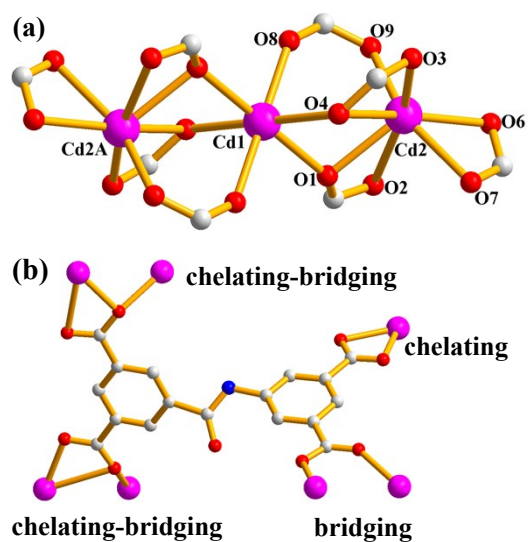

**Fig. S1** (a) The coordination environment of Cd(II) atoms in **1**; symmetry code: A  $1-x, -y, -z$ ; B  $-1+x, y, z$ ; C  $x, 1+y, -1+z$ ; D  $x, y, -1+z$ . (b) The three coordination modes of H<sub>4</sub>L in **1**.

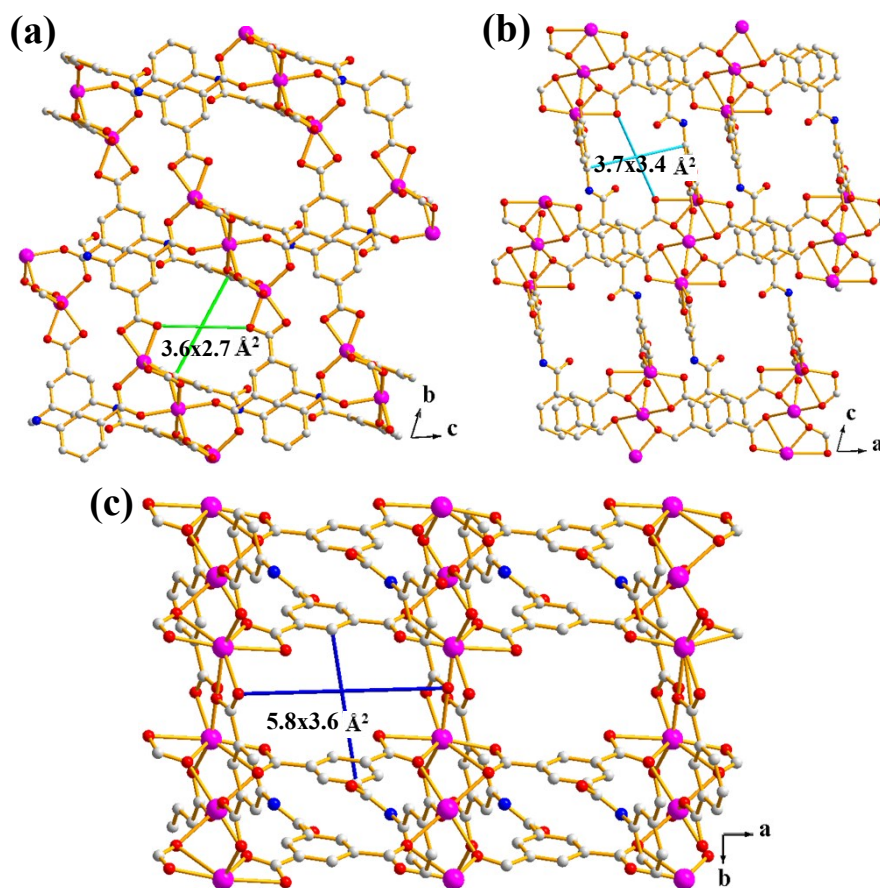

**Fig. S2** Ball-and-stick representation of 3D framework of **1** showing channels along the *a* (a), *b* (b) and *c* (c) direction, respectively.

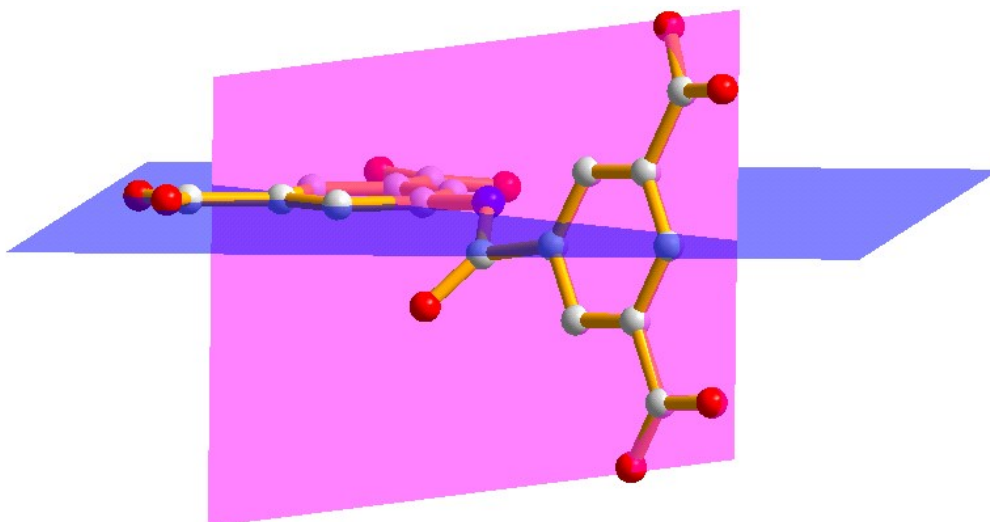

**Fig. S3** Conformation of L<sup>4</sup> linker in **1** in which the two terminal isophthalic moieties are not coplanar with a dihedral angle of about 80.2°.

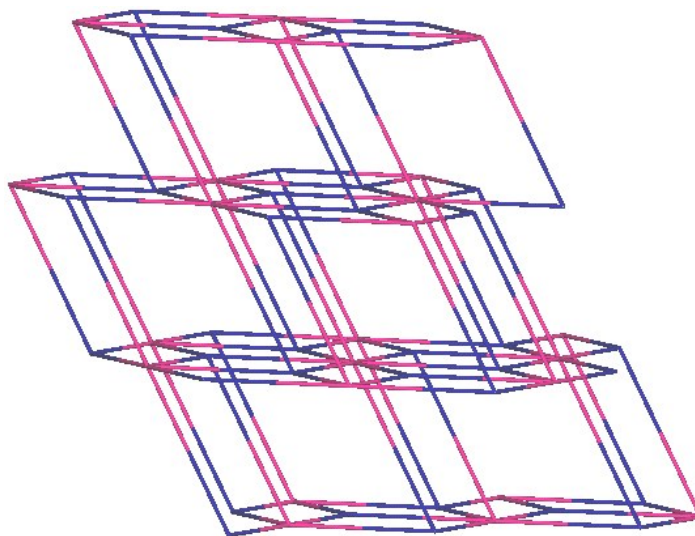

**Fig. S4** The 4,8-connected *flu* network in **1** shown as a stick diagram.

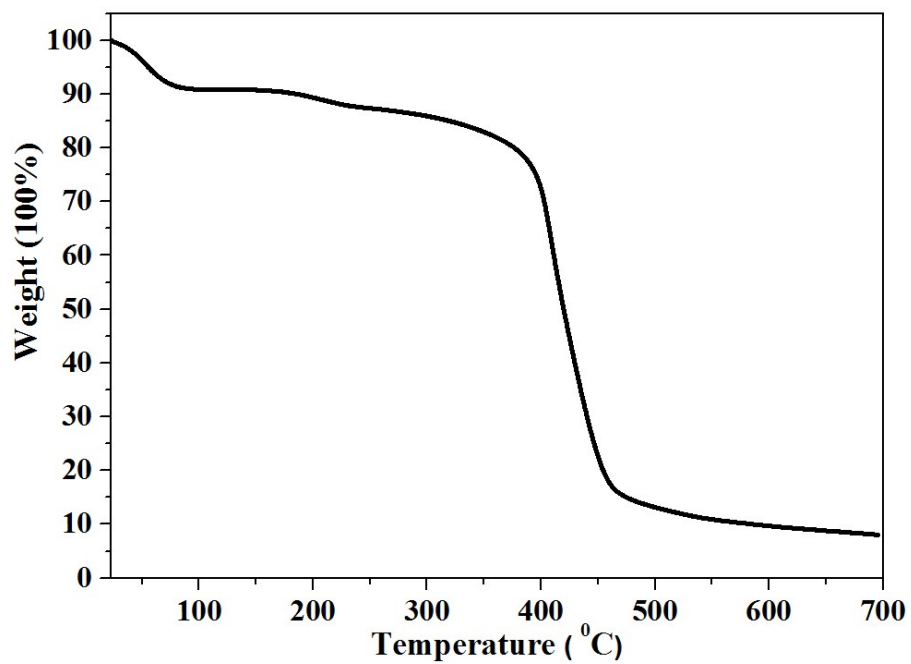

Fig. S5 TGA data of 1.

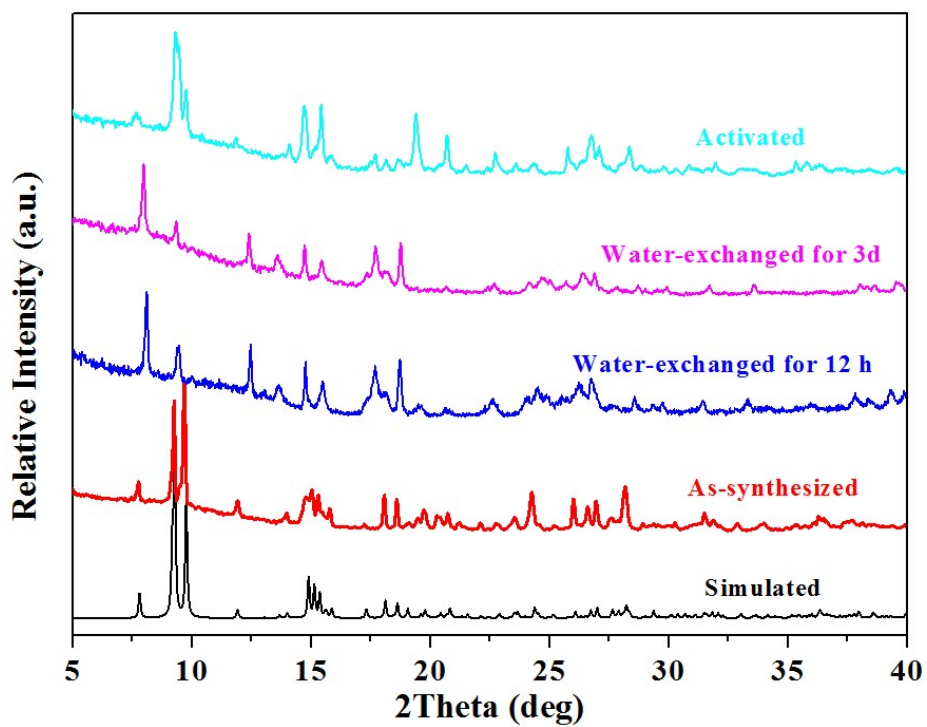

Fig. S6 PXRD patterns for 1: a simulated PXRD pattern from the single-crystal structure, as-synthesized, water-exchanged and activated samples, respectively.

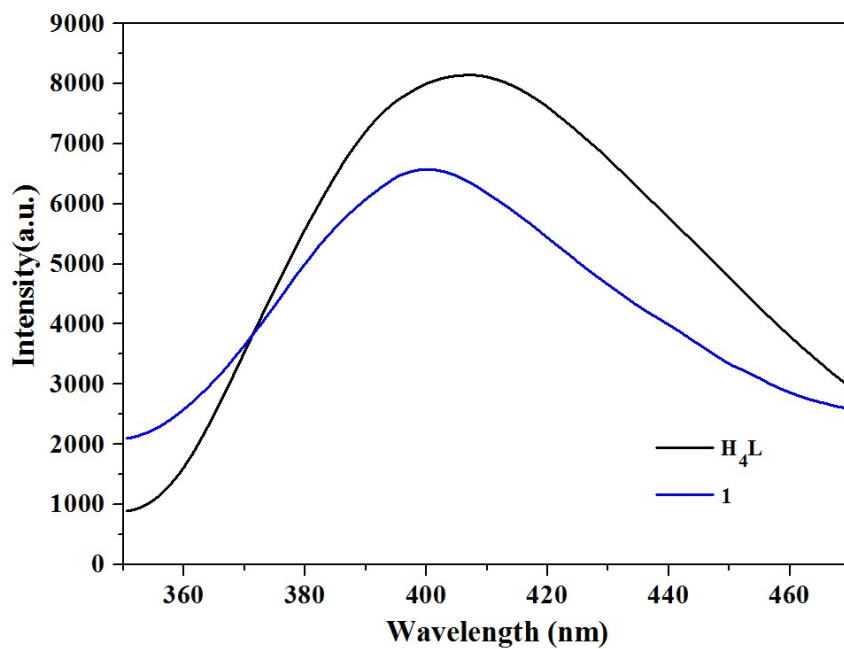

Fig. S7 Solid-state luminescence spectra of H<sub>4</sub>L and **1** at room temperature.

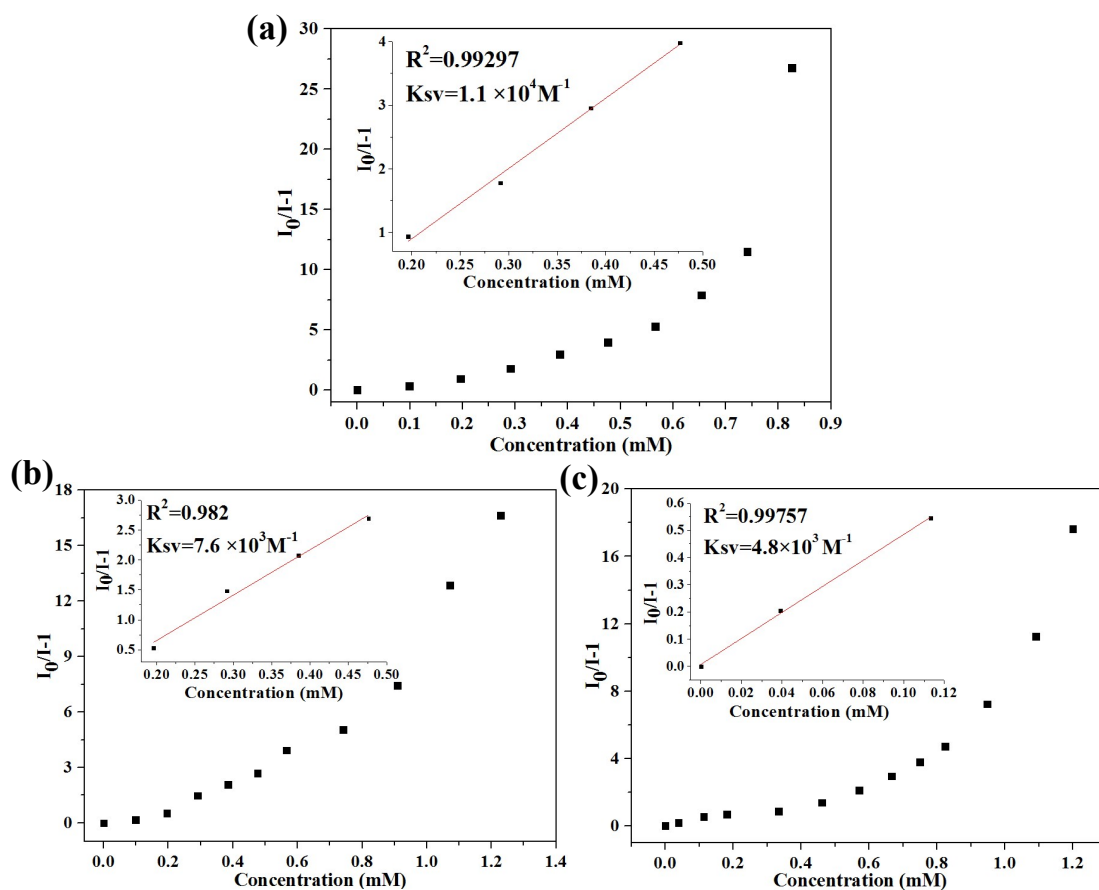

Fig. S8 The Stern-Volmer plots for **1** with Fe<sup>3+</sup> (a), Cu<sup>2+</sup> (b) and Cr<sub>2</sub>O<sub>7</sub><sup>2-</sup> (c).

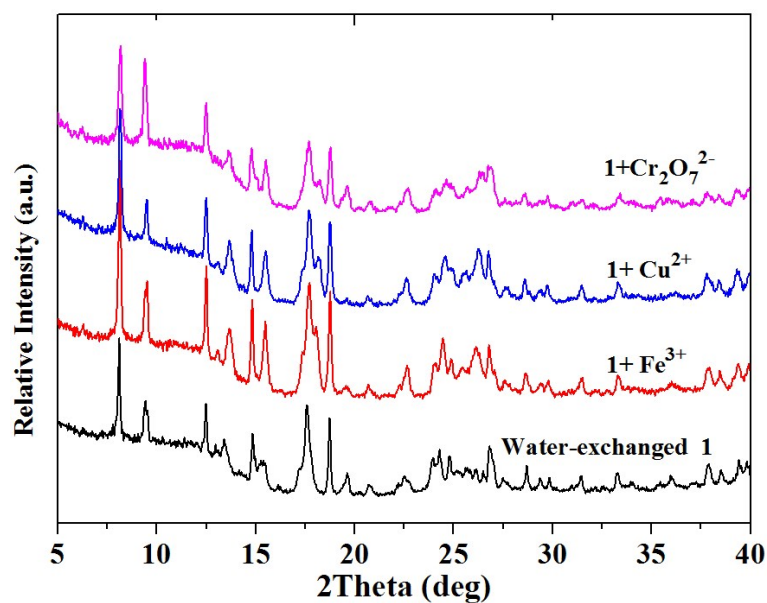

**Fig. S9** Experimental XRD patterns of **1** before and after treated with aqueous solution of different ions.

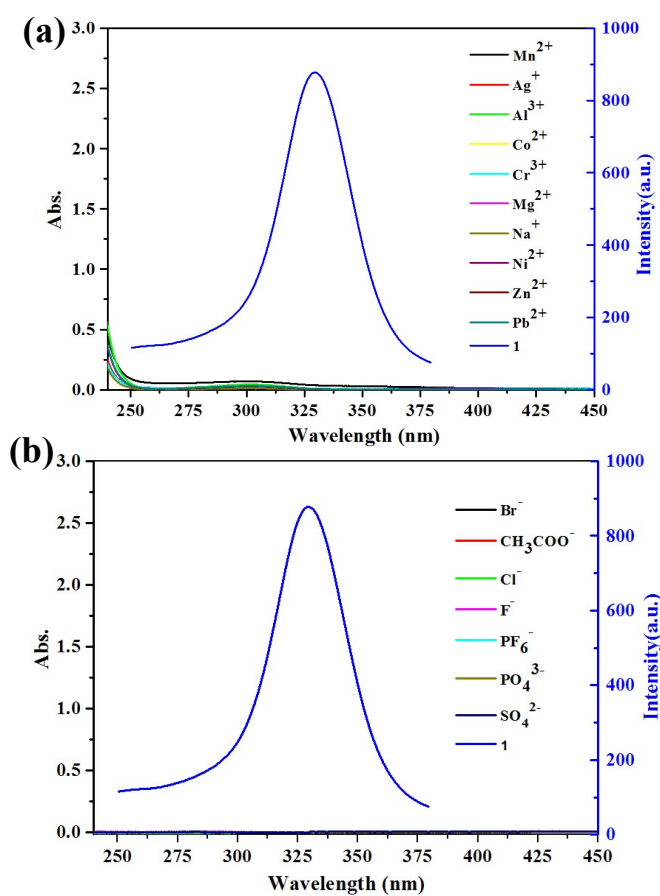

**Fig. S10** View for the UV-vis adsorption spectra of some metal ions (a) and anions (b) in water and exaction spectrum for **1**.

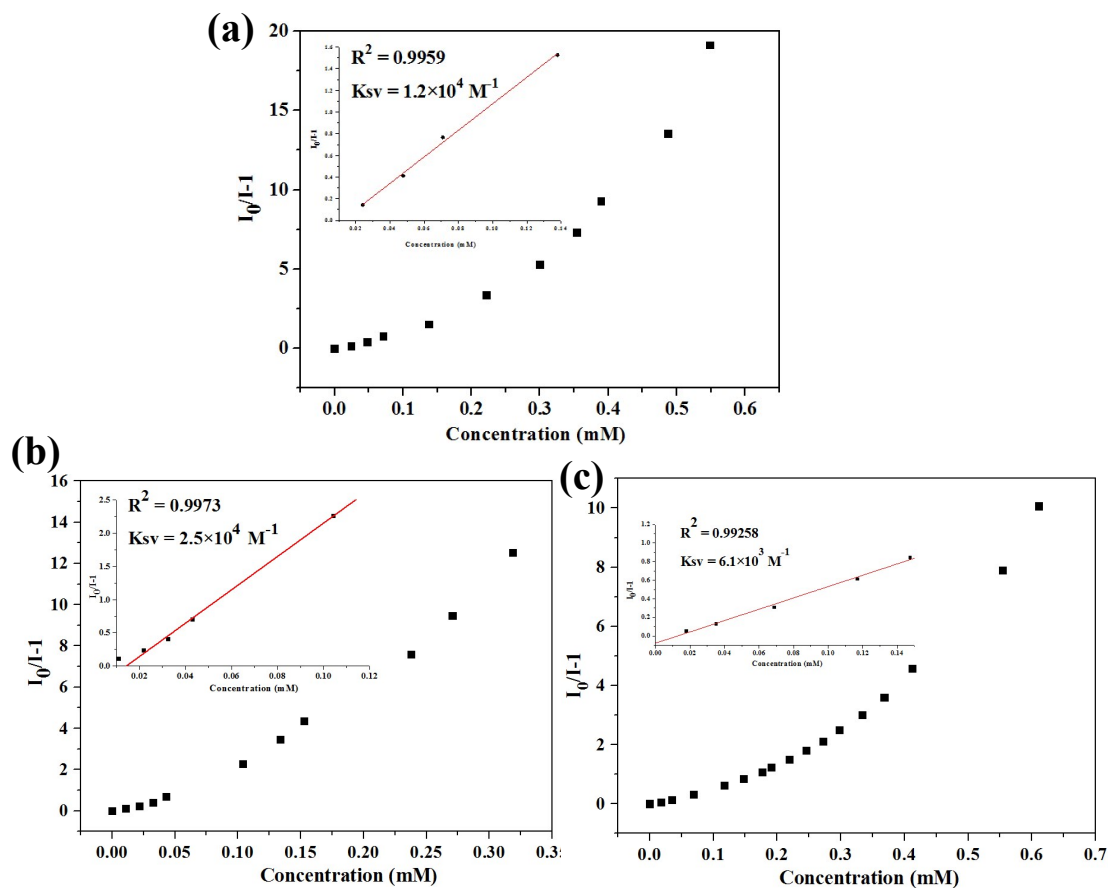

Fig. S11 The Stern-Volmer plots for 1 with NB (a), 4-NT (b) and 1,3-DNB (c).

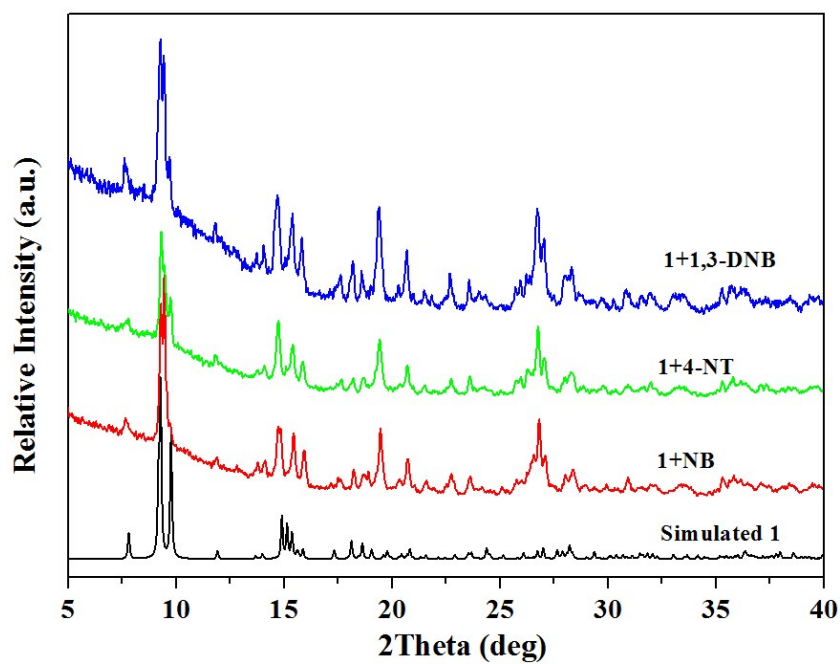

Fig. S12 Simulated and experimental XRD patterns of 1 after treated with different nitroaromatics.

**Table S1** Summary of some MOF-based sensors for detecting Fe<sup>3+</sup> and Cu<sup>2+</sup> ions

| MOFs                                                                                                 | analyte          | $K_{SV}$ (M <sup>-1</sup> ) | solvent          | reference |
|------------------------------------------------------------------------------------------------------|------------------|-----------------------------|------------------|-----------|
| $\{[(CH_3)_2NH_2]_4[Ca_2Zn_4(L)_4] \cdot 4DMF\}_n$                                                   | Fe <sup>3+</sup> | $4.36 \times 10^3$          | H <sub>2</sub> O | 1         |
| [Eu(IMS1) <sub>2</sub> ]Cl·4H <sub>2</sub> O                                                         | Fe <sup>3+</sup> | $5.87 \times 10^3$          | H <sub>2</sub> O | 2         |
| Zn-TCPP                                                                                              | Fe <sup>3+</sup> | $1.08 \times 10^4$          | EtOH             | 3         |
| $\{[Cd_2(L)_2(bpe)_2] \cdot 3DMF \cdot 2.5H_2O\}_n$                                                  | Fe <sup>3+</sup> | $1.7 \times 10^4$           | DMF              | 4         |
| [Tb <sub>4</sub> (L) <sub>6</sub> (H <sub>2</sub> O) <sub>8</sub> ]                                  | Fe <sup>3+</sup> | $1.88 \times 10^4$          | H <sub>2</sub> O | 5         |
| Eu-MOF                                                                                               | Fe <sup>3+</sup> | $2.09 \times 10^4$          | H <sub>2</sub> O | 6         |
| $\{[Cd(L)(BPDC)] \cdot 2H_2O\}_n$                                                                    | Fe <sup>3+</sup> | $3.63 \times 10^4$          | H <sub>2</sub> O | 7         |
| $\{[Cd(L)(SDBA)(H_2O)] \cdot 0.5H_2O\}_n$                                                            | Fe <sup>3+</sup> | $3.59 \times 10^4$          | H <sub>2</sub> O | 7         |
| $([Zn_2Na_2(TPHC)(4,4-Bipy)(DMF)] \cdot 8H_2O)$ (JLU-MOF71)                                          | Fe <sup>3+</sup> | $5.77 \times 10^4$          | DMF              | 8         |
| CPP-16                                                                                               | Cu <sup>2+</sup> | $7.85 \times 10^3$          | MeCN             | 9         |
| Zr <sub>6</sub> O <sub>4</sub> (OH) <sub>4</sub> (TCPPH <sub>2</sub> ) <sub>3</sub> (MOF-525)        | Cu <sup>2+</sup> | $4.5 \times 10^5$           | DMF              | 10        |
| Eu@3                                                                                                 | Cu <sup>2+</sup> | 501.2                       | DMF              | 11        |
| Eu <sub>2</sub> (FMA) <sub>2</sub> (OX)(H <sub>2</sub> O) <sub>4</sub> ·4H <sub>2</sub> O            | Cu <sup>2+</sup> | 528.7                       | H <sub>2</sub> O | 12        |
| <b>(Me<sub>2</sub>NH<sub>2</sub>)<sub>2</sub>[Cd<sub>3</sub>(L)<sub>2</sub>]·7H<sub>2</sub>O (1)</b> | Fe <sup>3+</sup> | $1.1 \times 10^4$           | H <sub>2</sub> O | This work |
|                                                                                                      | Cu <sup>2+</sup> | $7.6 \times 10^3$           | H <sub>2</sub> O | This work |



**Table S2** Summary of some MOF-based sensors for detecting Cr<sub>2</sub>O<sub>7</sub><sup>2-</sup> ions

| MOFs                                                                                                                                    | analyte                                      | K <sub>SV</sub> (M <sup>-1</sup> ) | solvent          | reference |
|-----------------------------------------------------------------------------------------------------------------------------------------|----------------------------------------------|------------------------------------|------------------|-----------|
| {[(CH <sub>3</sub> ) <sub>2</sub> NH <sub>2</sub> ] <sub>4</sub> [Ca <sub>2</sub> Zn <sub>4</sub> (L) <sub>4</sub> ]·4DMF} <sub>n</sub> | Cr <sub>2</sub> O <sub>7</sub> <sup>2-</sup> | 1.15×10 <sup>3</sup>               | H <sub>2</sub> O | 1         |
| [Cd <sub>3</sub> (cpota) <sub>2</sub> (phen) <sub>3</sub> ] <sub>n</sub> ·5nH <sub>2</sub> O                                            | Cr <sub>2</sub> O <sub>7</sub> <sup>2-</sup> | 1.21×10 <sup>3</sup>               | H <sub>2</sub> O | 13        |
| [Zn(IPA)(3-PN)] <sub>n</sub>                                                                                                            | Cr <sub>2</sub> O <sub>7</sub> <sup>2-</sup> | 1.37×10 <sup>3</sup>               | H <sub>2</sub> O | 14        |
| [Cd(IPA)(3-PN)] <sub>n</sub>                                                                                                            | Cr <sub>2</sub> O <sub>7</sub> <sup>2-</sup> | 2.91×10 <sup>3</sup>               | H <sub>2</sub> O | 14        |
| [Zn(btz)] <sub>n</sub>                                                                                                                  | Cr <sub>2</sub> O <sub>7</sub> <sup>2-</sup> | 3.19×10 <sup>3</sup>               | H <sub>2</sub> O | 15        |
| {[Zn <sub>2</sub> (ttz)H <sub>2</sub> O] <sub>n</sub> }                                                                                 | Cr <sub>2</sub> O <sub>7</sub> <sup>2-</sup> | 2.19×10 <sup>3</sup>               | H <sub>2</sub> O | 14        |
| {[Cd <sub>2</sub> (L) <sub>2</sub> (bpe) <sub>2</sub> ]·3DMF·2.5H <sub>2</sub> O} <sub>n</sub>                                          | Cr <sub>2</sub> O <sub>7</sub> <sup>2-</sup> | 3.7×10 <sup>3</sup>                | DMF              | 4         |
| [Tb <sub>4</sub> (L) <sub>6</sub> (H <sub>2</sub> O) <sub>8</sub> ]                                                                     | Cr <sub>2</sub> O <sub>7</sub> <sup>2-</sup> | 4.1×10 <sup>3</sup>                | H <sub>2</sub> O | 5         |
| {[Cd(L)(BPDC)]·2H <sub>2</sub> O} <sub>n</sub>                                                                                          | Cr <sub>2</sub> O <sub>7</sub> <sup>2-</sup> | 6.4×10 <sup>3</sup>                | H <sub>2</sub> O | 7         |
| {[Cd(L)(SDBA)(H <sub>2</sub> O)]·0.5H <sub>2</sub> O} <sub>n</sub>                                                                      | Cr <sub>2</sub> O <sub>7</sub> <sup>2-</sup> | 4.97×10 <sup>3</sup>               | H <sub>2</sub> O | 7         |
| {[Zn <sub>2</sub> (TPOM)(NH <sub>2</sub> -BDC) <sub>2</sub> ]·4H <sub>2</sub> O} <sub>n</sub>                                           | Cr <sub>2</sub> O <sub>7</sub> <sup>2-</sup> | 7.59×10 <sup>3</sup>               | DMF              | 16        |
| NU-1000                                                                                                                                 | Cr <sub>2</sub> O <sub>7</sub> <sup>2-</sup> | 1.34×10 <sup>4</sup>               | H <sub>2</sub> O | 17        |
| (Me <sub>2</sub> NH <sub>2</sub> ) <sub>2</sub> [Cd <sub>3</sub> (L) <sub>2</sub> ]·7H <sub>2</sub> O (1)                               | Cr <sub>2</sub> O <sub>7</sub> <sup>2-</sup> | 4.8×10 <sup>3</sup>                | H <sub>2</sub> O | This work |

## References

- 1 W.-J. Ji, G.-F. Liu, B.-Q. Wang, W.-B. Lu and Q.-G. Zhai, *CrystEngComm*, 2020, **22**, 4710-4715.
- 2 Y.-Q. Huang, H.-Y. Chen, Y. Wang, Y.-H. Ren, Z.-G. Li, L.-C. Li and Y. Wang, *RSC Adv.*, 2018, **8**, 21444-21450.
- 3 Y. Jiang, L. Sun, J. Du, Y. Liu, H. Shi, Z. Liang and J. Li, *Cryst. Growth Des.*, 2017, **17**, 2090-2096.
- 4 Z. Chen, X. Mi, J. Lu, S. Wang, Y. Li, J. Doua and D. Li, *Dalton Trans.*, 2018, **47**, 6240-6249.

- 5 X. Wang, J. L. Li, C. Jiang, P. Hu, B. Li, T. Zhang and H. C. Zhou, *Chem. Commun.*, 2018, **54**, 13271-13274.
- 6 J. Wang, M. Jiang, L. Yan, R. Peng, M. Huangfu, X. Guo, Y. Li and P. Wu, *Inorg. Chem.*, 2016, **55**, 12660-12668.
- 7 S. Chen, Z. Shi, L. Qin, H. Jia and H. Zheng, *Cryst. Growth Des.*, 2016, **17**, 67-72.
- 8 C. Yu, X. Sun, L. Zou, G. Li, L. Zhang and Y. Liu, *Inorg. Chem.*, 2019, **58**, 4026-4032.
- 9 W. Cho, H. J. Lee, G. Choi, S. Choi and M. Oh, *J. Am. Chem. Soc.*, 2014, **136**, 12201-12204.
- 10 L. Li, S. Shen, R. Lin, Y. Baia and H. Liu, *Chem. Commun.*, 2017, **53**, 9986-9989.
- 11 J.-Y. Liang, G.-P. Li, R.-C. Gao, N.-N. Bai, W.-Q. Tong, L. Hou and Y.-Y. Wang, *Cryst. Growth Des.*, 2017, **17**, 6733-6740.
- 12 Y. Xiao, Y. Cui, Q. Zheng, S. Xiang, G. Qian and B. Chen, *Chem. Commun.*, 2010, **46**, 5503-5505.
- 13 S. Li, L. Lu, M. Zhu, C. Yuan and S. Feng, *Sensor Actuat. B-Chem.*, 2018, **258**, 970-980.
- 14 B. Parmar, Y. Rachuri, K. K. Bisht, R. Laiya and E. Suresh, *Inorg. Chem.*, 2017, **56**, 2627-2638.
- 15 C. Cao, H. Hu, H. Xu, W. Qiao and B. Zhao, *CrystEngComm*, 2016, **18**, 4445-4451.
- 16 R. Lv, J. Wang, Y. Zhang, H. Li, L. Yang, S. Liao, W. Gu and X. Liu, *J. Mater. Chem. A*, 2016, **4**, 15494-15500.
- 17 Z.-J. Lin, H.-Q. Zheng, H.-Y. Zheng, L.-P. Lin, Q. Xin and R. Cao, *Inorg. Chem.*, 2017, **56**, 14178-14188.
